# Supplementary material for: Two-dimensional antiferromagnetic topological insulators in KCuSe/NaMnBi van der Waals heterobilayers
Source: Royal Society of Chemistry journal article supplement (doi:10.1039/d2cp02996k), 2022-01-01
Supplement: d2cp02996k1.pdf [file d2cp02996k1.pdf]

## Supplemental Material for

### **Two-dimensional antiferromagnetic topological insulator in KCuSe/NaMnBi van der Waals heterobilayers**

Hongkai Ma,<sup>a</sup> Bingyang Li,<sup>a</sup> Xiaorong Zou,<sup>a</sup> Xiangting Hu,<sup>ab</sup> Ying Dai<sup>\*a</sup>, Baibiao  
Huang<sup>a</sup> and Chengwang Niu<sup>\*a</sup>

<sup>a</sup> School of Physics, State Key Laboratory of Crystal Materials, Shandong University,  
Jinan 250100, China

<sup>b</sup> Department of Physics, Southern University of Science and Technology, Shenzhen  
518055, China.

\*Corresponding author: daiy60@sina.com (Y.D.); c.niu@sdu.edu.cn (C.N.)

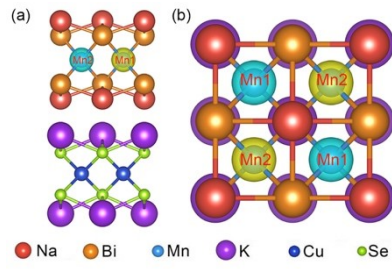

Fig. S1 Calculated isosurfaces of spin density functions in real space for KCuSe/NaMnBi van der Waals heterobilayers showing (a) side and (b) top views in square lattice.

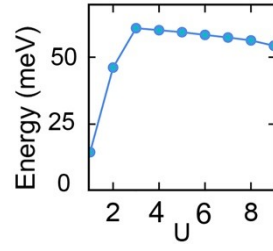

Fig. S2 Variation of the energy gaps for KCuSe/NaMnBi heterobilayer in AFM state with SOC. For the whole U interval from 1 to 9, the material remains topologically nontrivial.

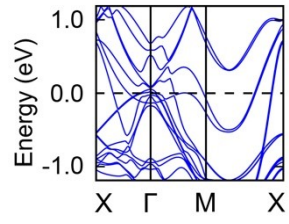

Fig. S3 Band structure of KCuSe/NaMnBi heterobilayer in ferromagnetic state with SOC. The Fermi level is indicated with a dashed horizontal line.

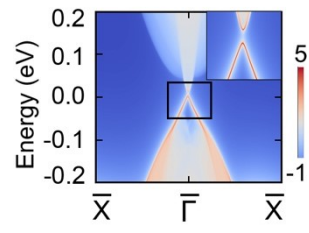

Fig. S4 Edge state of AFM KCuSe/NaMnBi heterobilayer with a termination of FM order. A small gap is clearly seen.

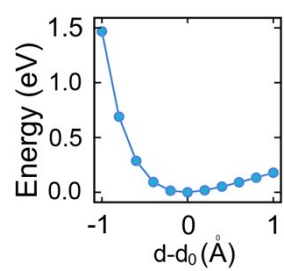

Fig. S5 The relative energies versus the variation ( $d - d_0$ ) in the separation between KCuSe and NaMnBi QLs. The total energy of the ground state with  $d_0 = 2.56 \text{ \AA}$  was set as 0 eV.
